# Supplementary material for: Direct and rapid analysis of trace levels steroids in water by thermal desorption atmospheric pressure photoionization mass spectrometry
Source: Royal Society of Chemistry journal article supplement (doi:10.1039/c8ay02611d), 2019-01-01
Supplement: c8ay02611d1.pdf [file c8ay02611d1.pdf]

## Supplementary Information

### **Direct and Rapid Analysis of Trace Level Steroids in Water by Thermal Desorption Atmospheric Pressure Photoionization Mass Spectrometry**

Wan Zhao<sup>1</sup>, Chengyuan Liu<sup>1</sup>, Hao Yin<sup>2</sup>, Keke Qi<sup>1</sup>, Minggao Xu<sup>1</sup>, Jiuzhong Yang<sup>1</sup>, and Yang Pan<sup>1,\*</sup>

*<sup>1</sup> National Synchrotron Radiation Laboratory, University of Science and Technology of China, Hefei 230029, China*

*<sup>2</sup> National Laboratory for Physical Sciences at Microscale, University of Science and Technology of China, Hefei, Anhui 230026, P.R. China*

\*Corresponding Author at:

Dr. Yang Pan

National Synchrotron Radiation Laboratory, University of Science and Technology of  
China, Hefei 230029, China

E-mail: panyang@ustc.edu.cn

Fax: +86-551-65141078

Tel: +86-551-63601986

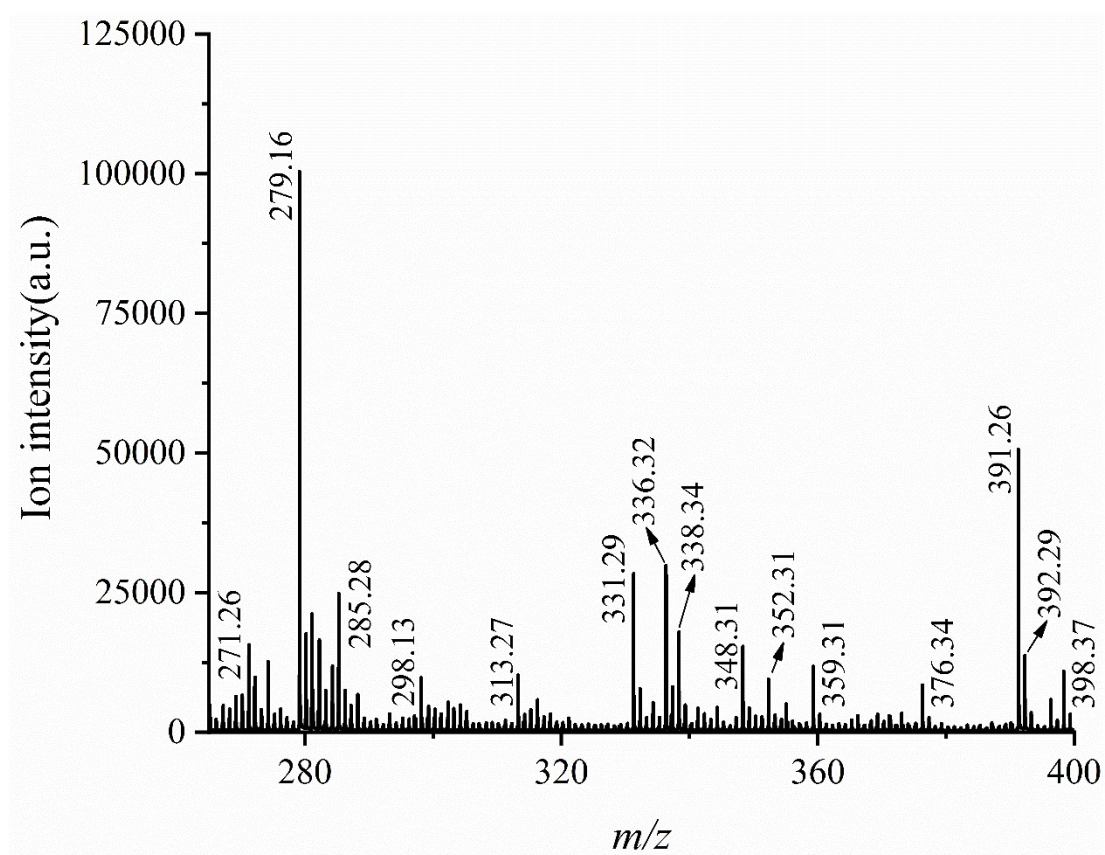

Figure S1. Mass spectrum of blank solution (methanol/distilled water, v:v = 1:9).

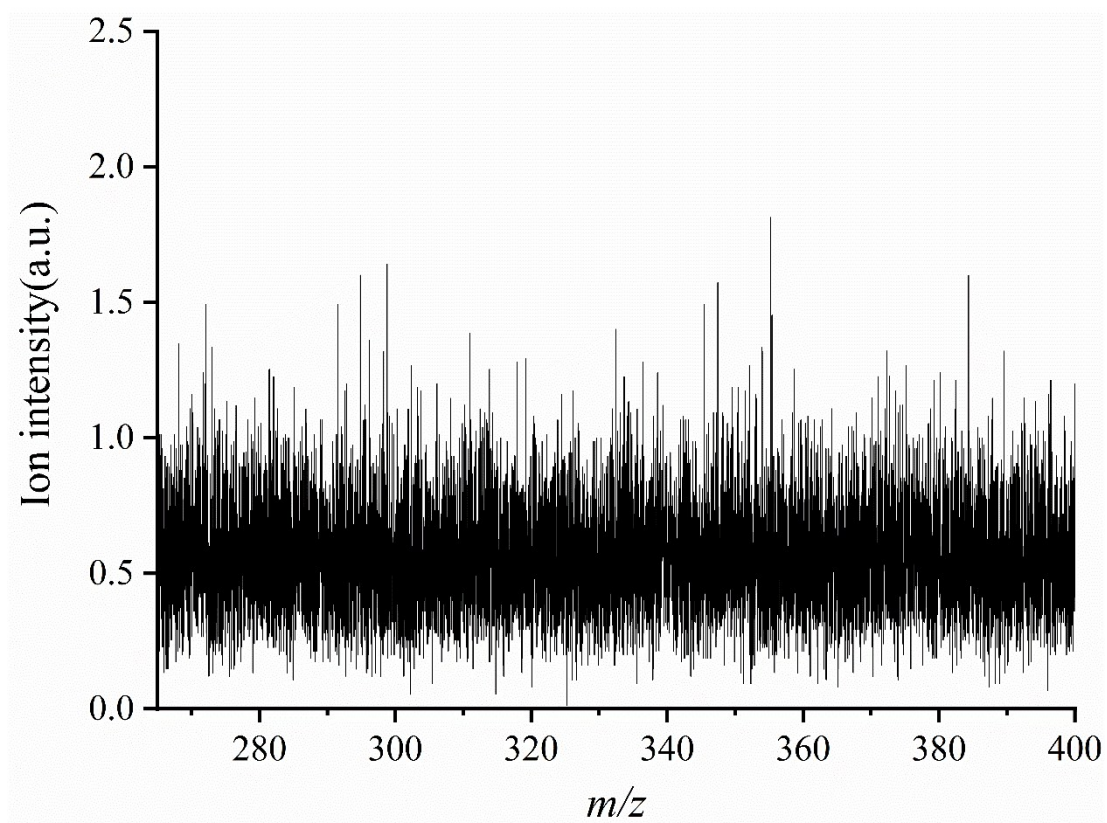

Figure S2. Mass spectrum for steroids (1  $\mu\text{g/mL}$ ) in methanol/ distilled water (v:v = 9: 1) with the VUV lamp off.

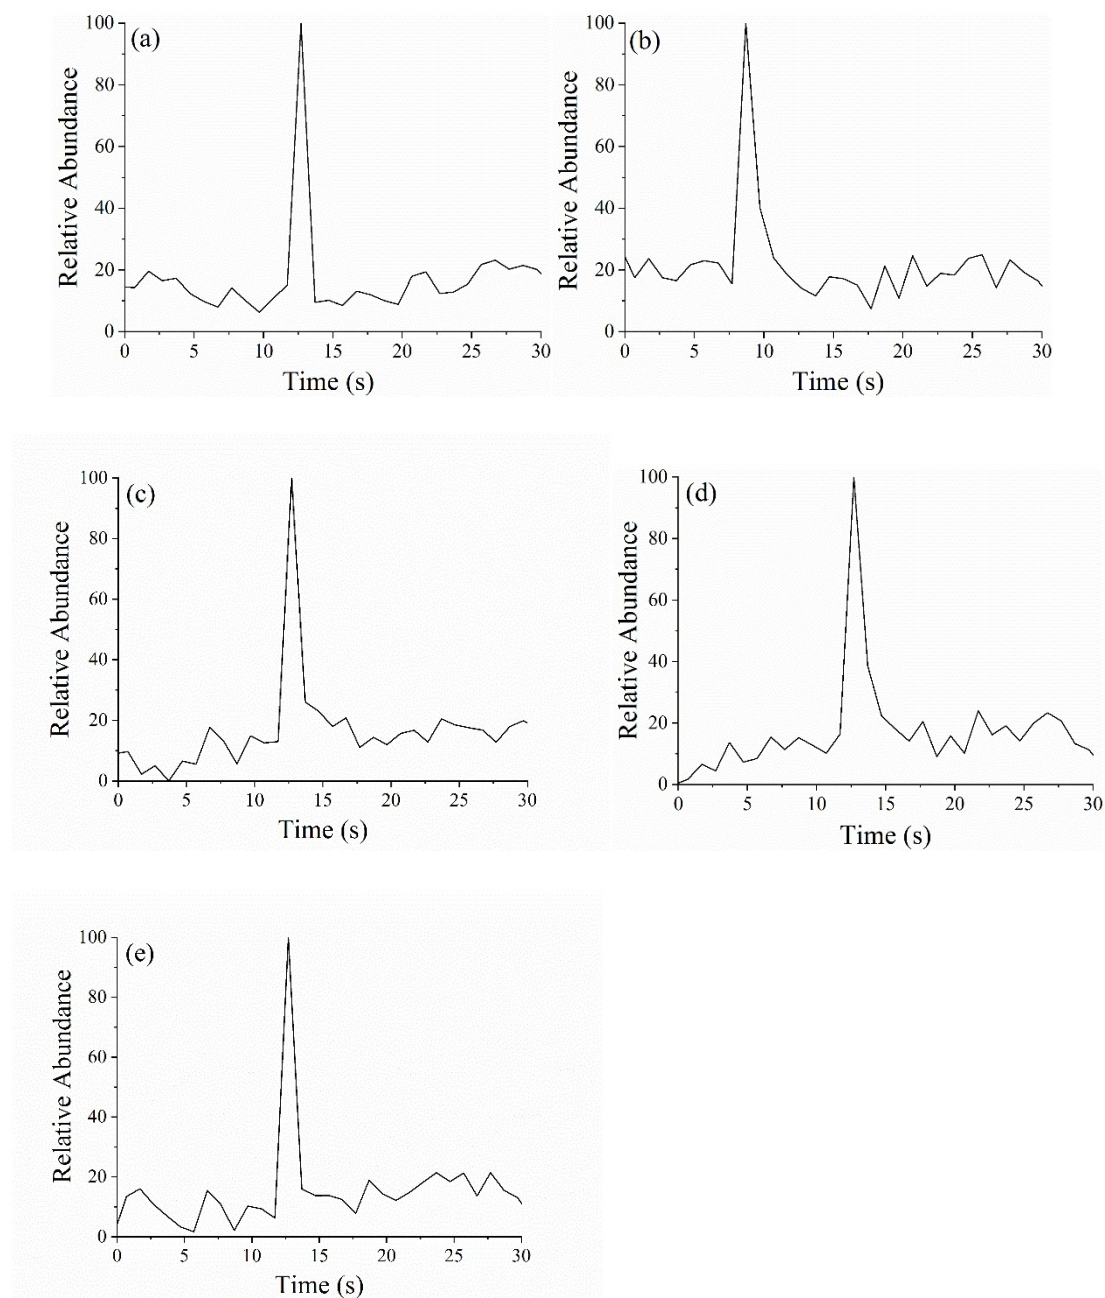

Figure S3. The extracted ion chromatogram (EIC) of (a) estradiol ( $m/z$  272.18), (b) androstenedione ( $m/z$  287.20), (c) norethindrone ( $m/z$  299.20), (d) methyltestosterone ( $m/z$  303.23), (e) progesterone ( $m/z$  315.23) in methanol/ distilled water (v:v = 9:1) at the concentration of LOD level.

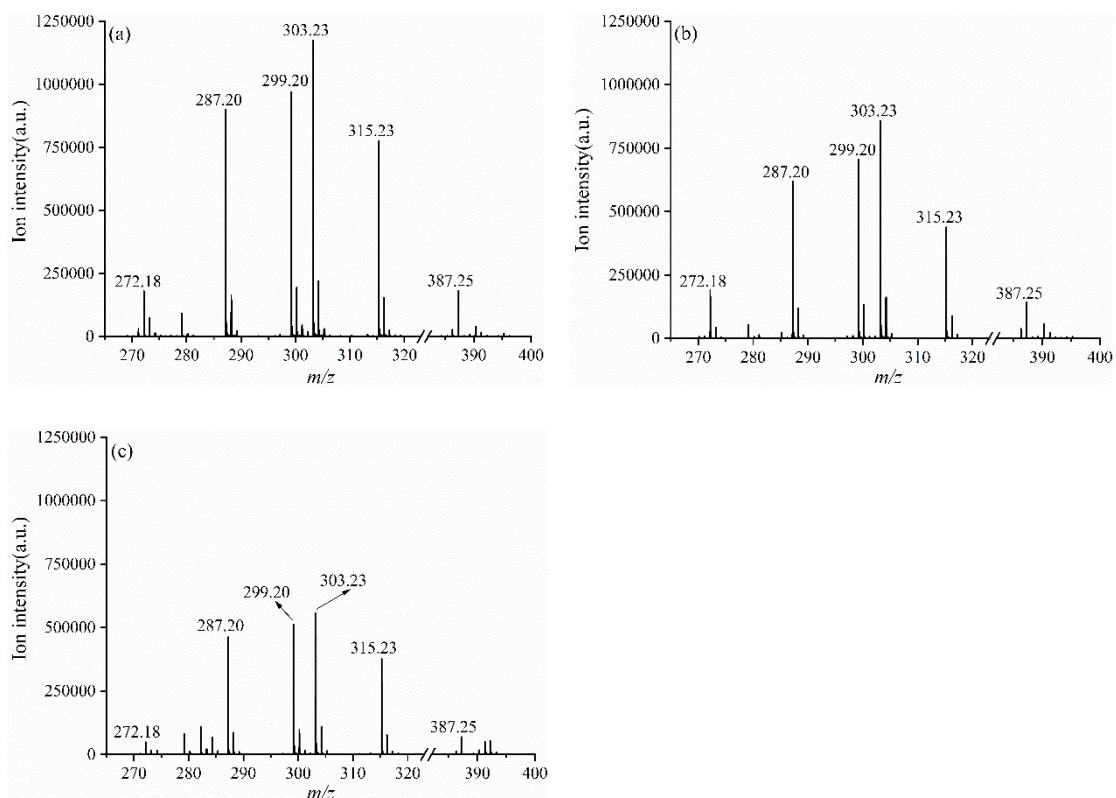

Figure S4. Mass spectra of five steroids (estradiol, androstenedione, norethindrone, methyltestosterone and progesterin, 1  $\mu\text{g/mL}$ ) and internal standard (medroxyprogesterone acetate, 50  $\text{ng/mL}$ ) in real waters: (a) steroids in methanol/tap water (v:v = 9:1); (b) steroids in methanol/surface water (v:v = 9:1); (c) steroids in methanol/river water (v:v = 9:1).
